# Supplementary material for: COVID-19 in Europe: from outbreak to vaccination
Source: Springer Nature journal article supplement (doi:10.1186/s12889-022-14454-5), 2022-12-02
Supplement: MOESM1 [file 23783408]

## A brief note on fuzzy sets

Given a non-empty set  $\Omega \subseteq \mathbb{R}^n$ , a fuzzy set  $A$  in  $\Omega$  is a set of ordered pairs [1]

$$A = \{(\mathbf{x}; \mu_A(\mathbf{x})), \quad \mathbf{x} \in \Omega\}$$

where  $\mu_A(\mathbf{x}) \in [0, 1]$  is the membership degree of  $\mathbf{x} \in \Omega$  in  $A$ . We use the notation  $A \leftrightarrow \mu_A$  to highlight the association between a fuzzy set and the corresponding membership function. If  $\mu_A(\mathbf{x}) = 1$ ,  $\mathbf{x}$  is a full member of  $A$  in the classical sense, and may be referred to as prototype of this set. So, prototypes are useful to identify or label fuzzy sets.

We say that the  $c \geq 2$  fuzzy sets  $A_1 \leftrightarrow \mu_{A_1}$ ,  $A_2 \leftrightarrow \mu_{A_2}$ , ...,  $A_c \leftrightarrow \mu_{A_c}$  in  $\Omega$  form a fuzzy  $c$ -partition of  $\Omega$  if, for  $i = 1, 2, \dots, c$ ,  $A_i$  has at least one prototype and

$$\forall \mathbf{x} \in \Omega, \quad \sum_{i=1}^c \mu_{A_i}(\mathbf{x}) = 1,$$

(see [2]). Therefore, each element  $\mathbf{x} \in \Omega$  is represented in a fuzzy  $c$ -partition by the unit sum vector

$$\boldsymbol{\mu}(\mathbf{x}) = (\mu_{A_1}(\mathbf{x}), \mu_{A_2}(\mathbf{x}), \dots, \mu_{A_c}(\mathbf{x})), \quad (1)$$

where its  $i^{th}$  coordinate accounts for the degree of belongingness of  $\mathbf{x}$  in  $A_i$ .

In general, a fuzzy analysis aims to estimate a fuzzy  $c$ -partition that hypothetically underlies the universe  $\Omega$  from where the observed data  $\mathbf{X}$  are sampled. Since  $\mathbf{X}$  is a countable subset of  $\Omega$ , we can alternatively write (1) for the  $k^{th}$  observation as follows:

$$\boldsymbol{\mu}_k = (\mu_{1k}, \mu_{2k}, \dots, \mu_{ck}), \quad k = 1, 2, \dots, N, \quad (2)$$

where  $N$  is the sample size. A fuzzy analysis therefore entails the estimation of the prototypes of every fuzzy  $c$ -partition set and, for each observation, the respective membership degrees vector as in (2). Usually, the prototypes are

arranged in a matrix in columns, e.g.,  $\mathbf{V} = [v_{ji}] \in \mathbb{R}^{n \times c}$ , and the membership degrees are grouped in the so-called partition matrix,  $\mathbf{U} = [\mu_{ik}] \in [0, 1]^{c \times N}$ . In this perspective, the outcome of a fuzzy approach to data analysis are the estimates of  $\mathbf{U}$  and  $\mathbf{V}$ , given  $\mathbf{X}$ .

## References

- [1] Bellman, R.E., Zadeh, L.A (1970). Decision-making in Fuzzy Environment, *Management Science*, 17(4), B141–B164.
- [2] Nguyen, H.T., Prasad, N.R., Walker, C.L., Walker, E.A. (2003). *A First Course in Fuzzy and Neural Control*. Chapman & Hall/CRC.
